# Supplementary material for: Room-temperature formation of alloy ZnxCd13−xSe13 magic-size clusters via cation exchange in diamine solution
Source: Royal Society of Chemistry journal article supplement (doi:10.1039/d2nr02399g), 2022-01-01
Supplement: d2nr02399g1.pdf [file d2nr02399g1.pdf]

## Supporting Information (SI)

### Room-temperature Formation of Alloy $\text{Zn}_x\text{Cd}_{13-x}\text{Se}_{13}$ Magic-size Clusters via Cation Exchange in Diamine Solution

Weijun Zhu,<sup>‡a</sup> Zhuohan Lin,<sup>‡a</sup> Xue Zhang,<sup>a</sup> Wei Wang,<sup>\*a</sup> and Yan Li,<sup>\*a</sup>

*Key Laboratory for Advanced Materials, Shanghai Key Laboratory of Functional Materials Chemistry, School of Chemistry and Molecular Engineering, East China University of Science and Technology, Shanghai 200237, China*

*\*E-mail: [weiw@ecust.edu.cn](mailto:weiw@ecust.edu.cn) (W. Wang); [yli@ecust.edu.cn](mailto:yli@ecust.edu.cn) (Y. Li).*

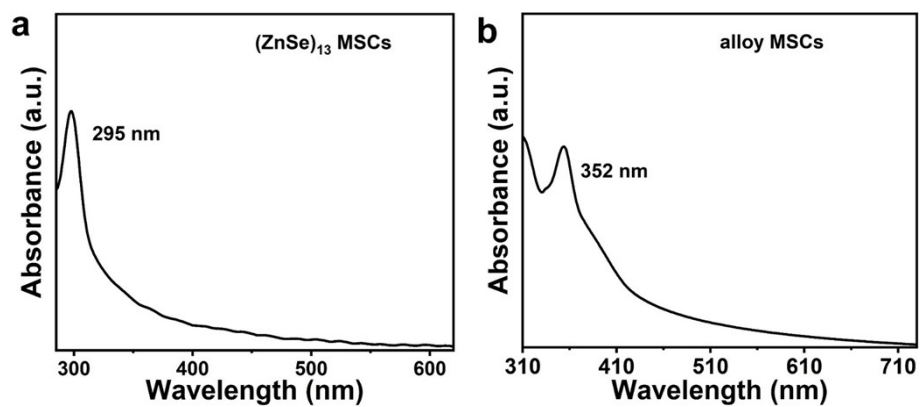

Fig. S1 Absorption spectra of MSCs after purification: (a)  $(\text{ZnSe})_{13}$  MSCs and (b) alloy MSCs.

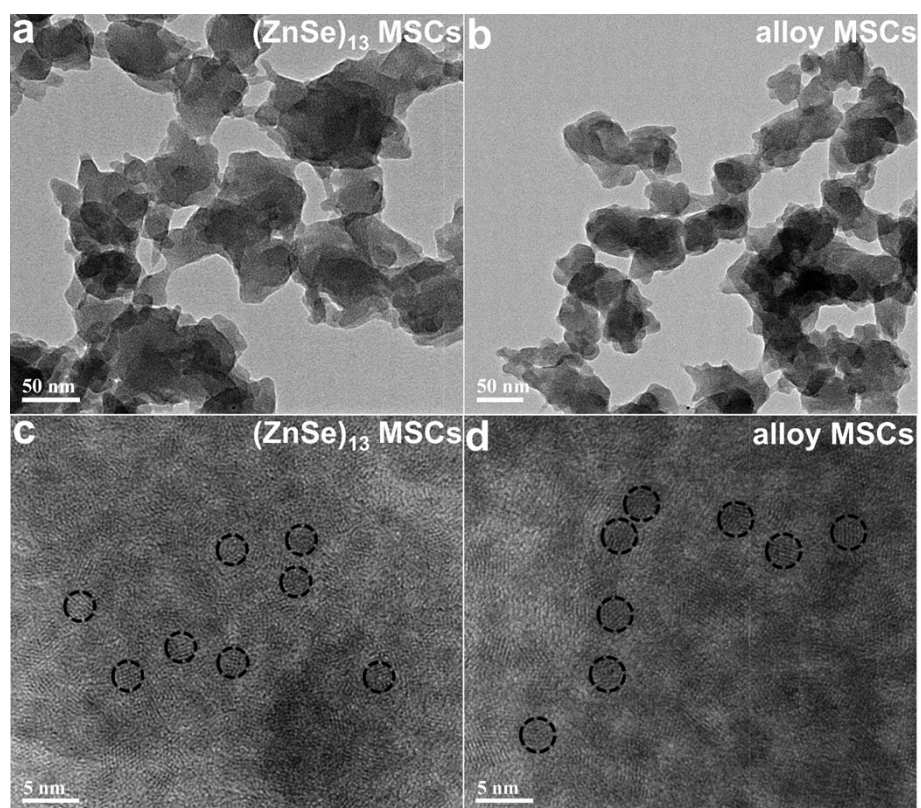

Fig. S2 TEM images of  $(\text{ZnSe})_{13}$  MSCs (a, c) and alloy MSCs (b, d).

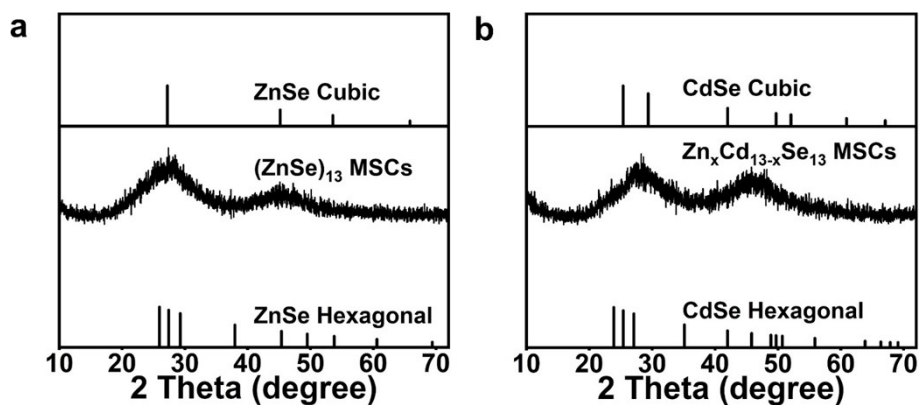

Fig. S3 XRD patterns of  $(\text{ZnSe})_{13}$  MSCs (a) and  $\text{Zn}_x\text{Cd}_{13-x}\text{Se}_{13}$  MSCs (b).

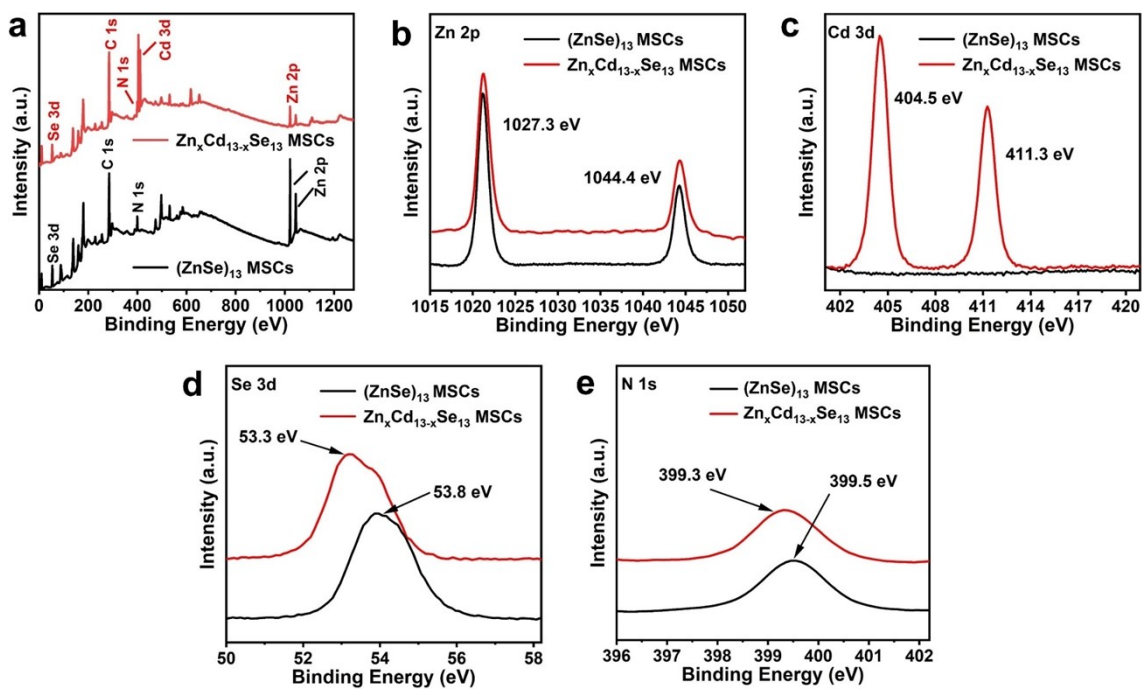

**Fig. S4** XPS of  $(\text{ZnSe})_{13}$  MSCs (black curve) and  $\text{Zn}_x\text{Cd}_{13-x}\text{Se}_{13}$  MSCs (red curve): survey spectra (a) and high-resolution spectra of Zn 2p (b), Cd 3d (c), Se 3d (d), and N1s (e).

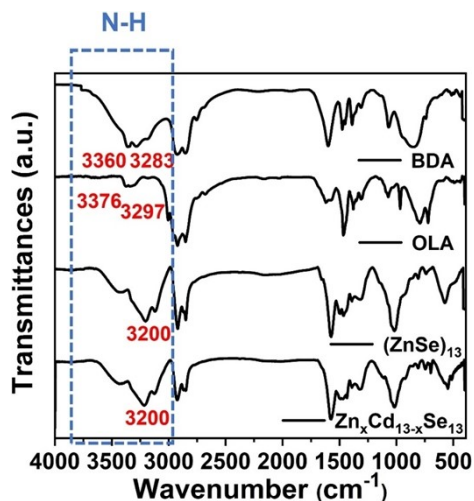

**Fig. S5** FTIR spectra of amine ligands,  $(\text{ZnSe})_{13}$  and  $\text{Zn}_x\text{Cd}_{13-x}\text{Se}_{13}$  MSCs.

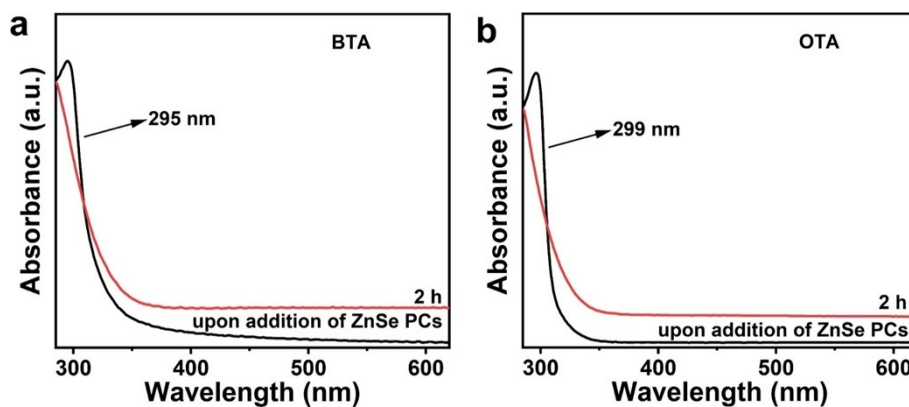

**Fig. S6** Evolution of absorption spectrum of ZnSe PCs (20  $\mu\text{L}$ ) after dispersing in monoamine of 3 mL BTA (a) or 3 mL OTA (b) at 25  $^{\circ}\text{C}$

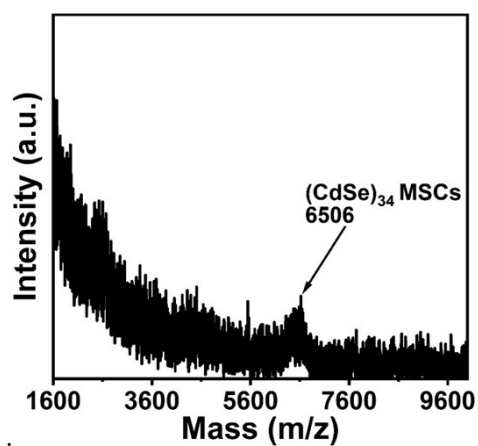

Fig. S7 MALDI-TOF MS of  $(\text{CdSe})_{34}$  MSCs.

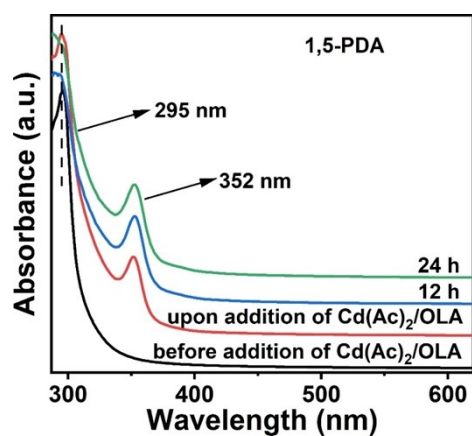

Fig. S8 Evolution of absorption spectrum of  $(\text{ZnSe})_{13}$  MSCs in 3.0 mL 1,5-PDA at 25 °C after adding  $\text{Cd}(\text{Ac})_2/\text{OLA}$  (20  $\mu\text{L}$ ).

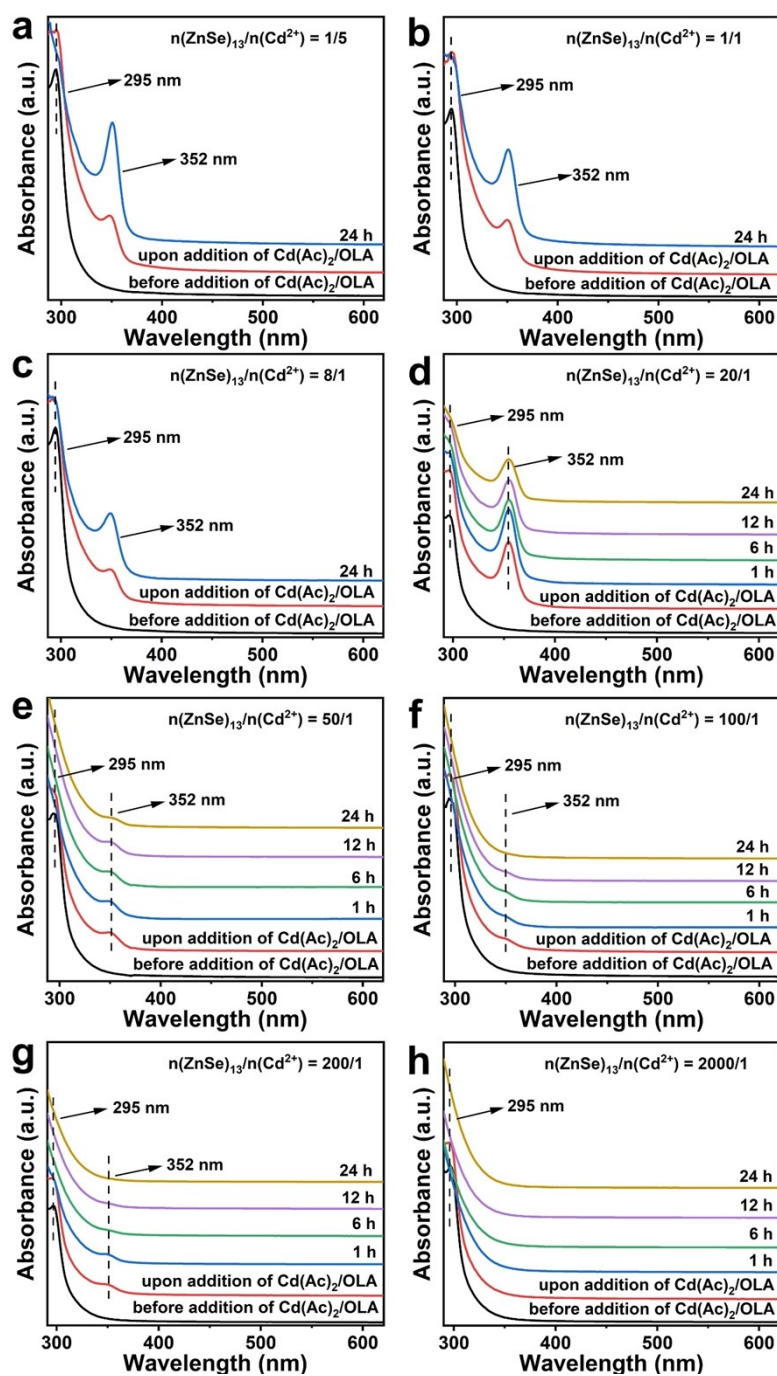

**Fig. S9** Evolution of absorption spectrum of  $(\text{ZnSe})_{13}$  MSCs in 3.0 mL BDA at 25 °C after adding different amount of  $\text{Cd}(\text{Ac})_2/\text{OLA}$ . The amount of  $(\text{ZnSe})_{13}$  MSCs (20  $\mu\text{L}$ ) is kept as a constant. The molar ratio of  $(\text{ZnSe})_{13}$  MSCs to  $\text{Cd}(\text{Ac})_2/\text{OLA}$  is changed: 5/1 (a), 1/1 (b), 8/1 (c), 20/1 (d), 50/1 (e), 100/1 (f), 200/1 (g), and 2000/1 (h).
